# Supplementary material for: Secondary ice production affects tropical convective clouds under different aerosol conditions
Source: Copernicus journal article supplement (doi:10.5194/egusphere-2025-5665), 2025-11-19
Supplement: Supplementary file 1 [file egusphere-2025-5665-supplement.pdf]

*Supplement of*

**Secondary ice production affects tropical convective clouds under different aerosol conditions**

5 **Mengyu Sun et al.**

*Correspondence to: Mengyu Sun (mengyu.sun@manchester.ac.uk)*

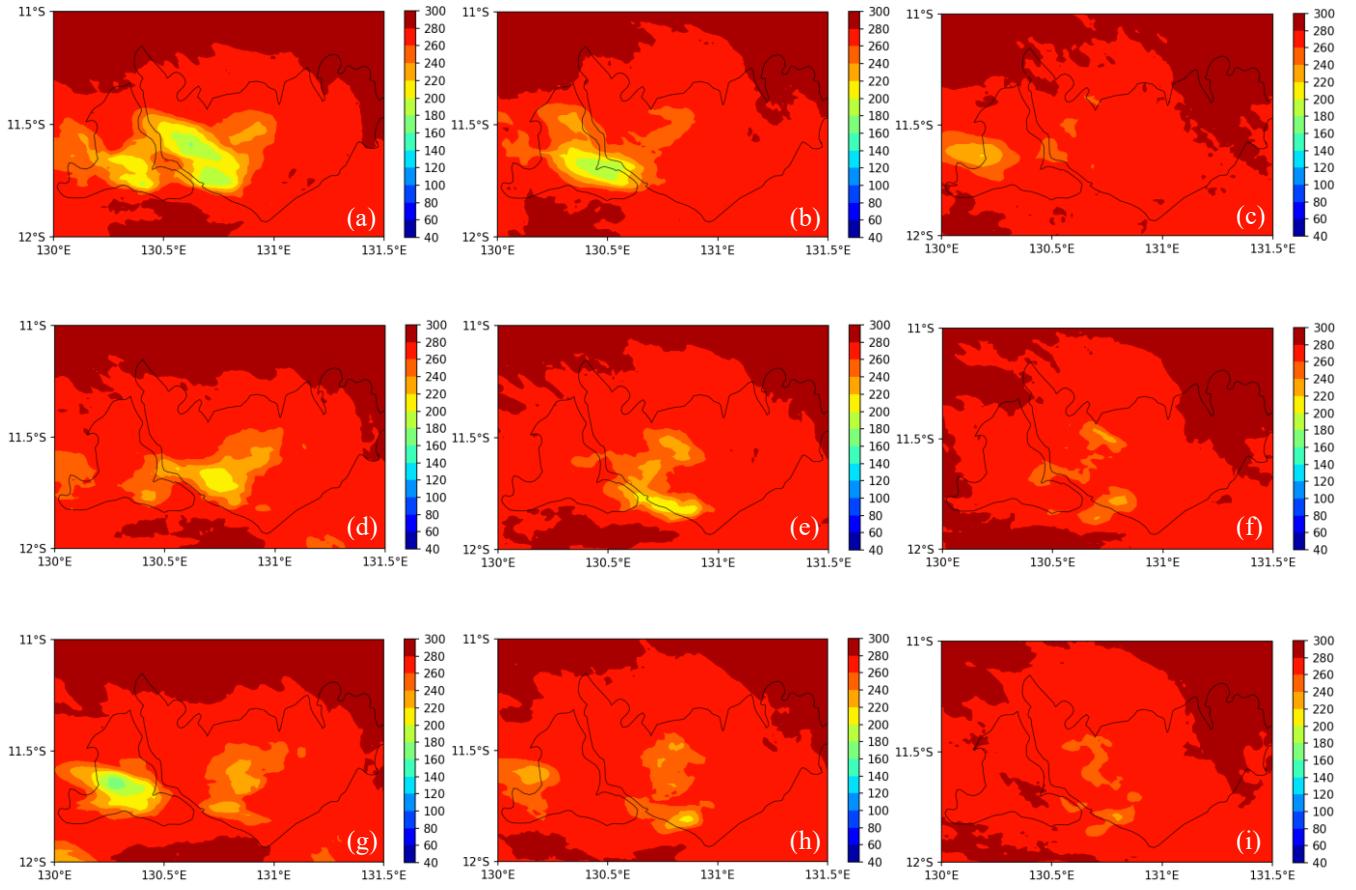

**Figure S1.** Spatial distribution of OLR ( $\text{W m}^{-2}$ ) from noSIP simulations for (a–c)  $N_d = 200 \text{ cm}^{-3}$ , (d–f)  $N_d = 400 \text{ cm}^{-3}$ , and (g–i)  $N_d = 800 \text{ cm}^{-3}$  at 06:30, 07:30, and 08:30 UTC on 6 February 2006.

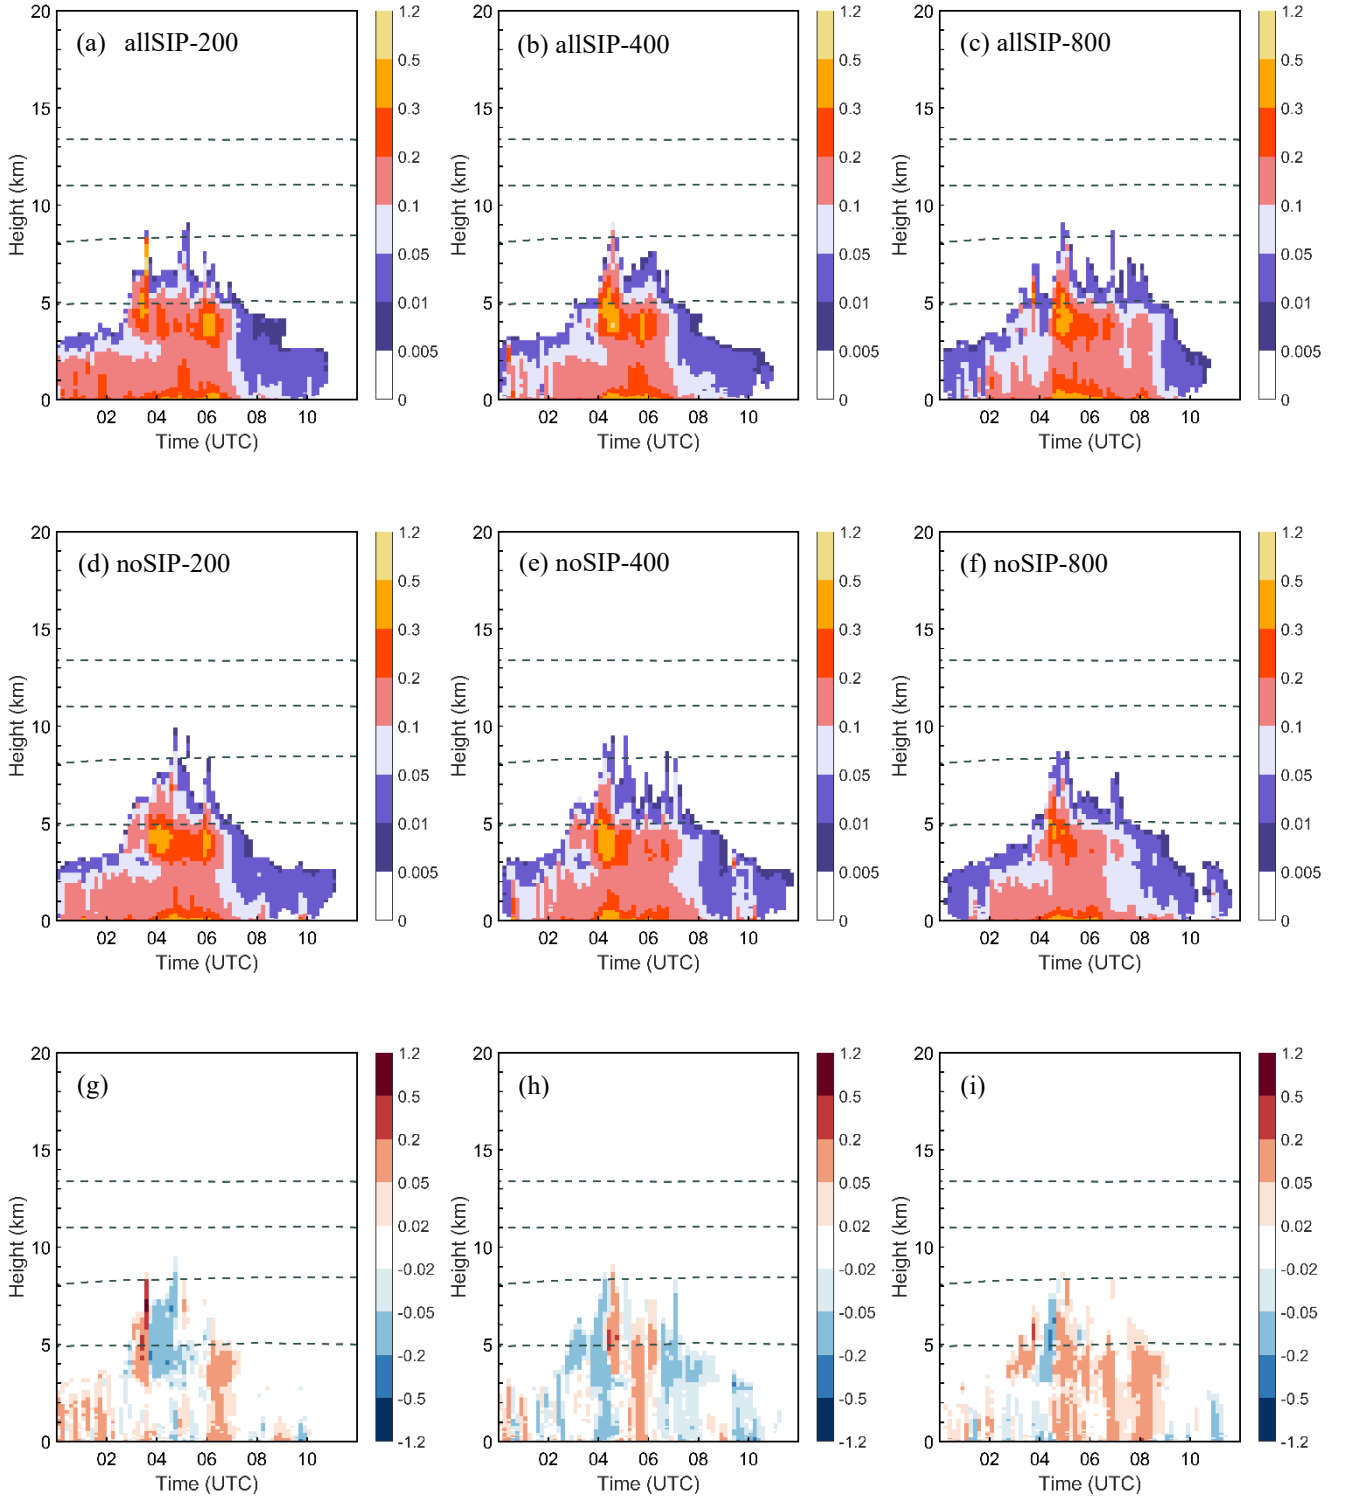

**Figure S2.** Time–height cross sections of rain water content (RWC;  $\text{g m}^{-3}$ ) for simulations with all SIP mechanisms included: (a) allSIP-200, (b) allSIP-400, and (c) allSIP-800; and without SIP: (d) noSIP-200, (e) noSIP-400, and (f) noSIP-800. Panels (g–i) show the differences between allSIP and noSIP simulations at each CCN concentration ( $N_d = 200, 400, 800 \text{ cm}^{-3}$ ; i.e., allSIP minus noSIP). Panels (a–f) are averaged over the area where either the ice water path or rain water path exceeds  $1 \text{ g m}^{-2}$ . The 0, -20, -40, and -60 °C isotherms are shown by the dashed lines.

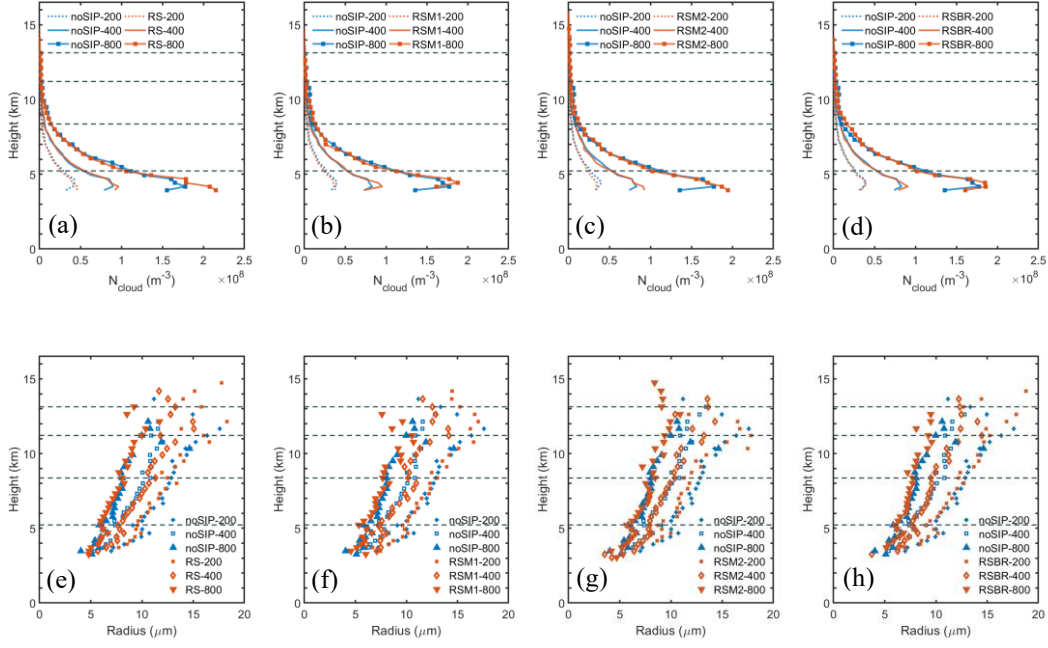

**Figure S3.** Vertical profiles of horizontally averaged (a-d) number concentration of cloud droplet ( $N_{cloud}$ ) and (e-h) mean-mass radius of cloud droplet, from simulations without SIP (noSIP) and with different SIP configurations: (a, e) RS, (b, f) RSM1, (c, g) RSM2, and (d, h) RSBR. Dotted lines denote  $N_d = 200$  cm $^{-3}$ , solid lines denote  $N_d = 400$  cm $^{-3}$ , and solid lines with square markers denote  $N_d = 800$  cm $^{-3}$ . All profiles are averaged over the area where either the ice water path or rain water path exceeds 1 g m $^{-2}$ , during 02:30–08:30 UTC on 6 February 2006. Gray dashed lines indicate the 0, -20, -40, and -60 °C isotherms.

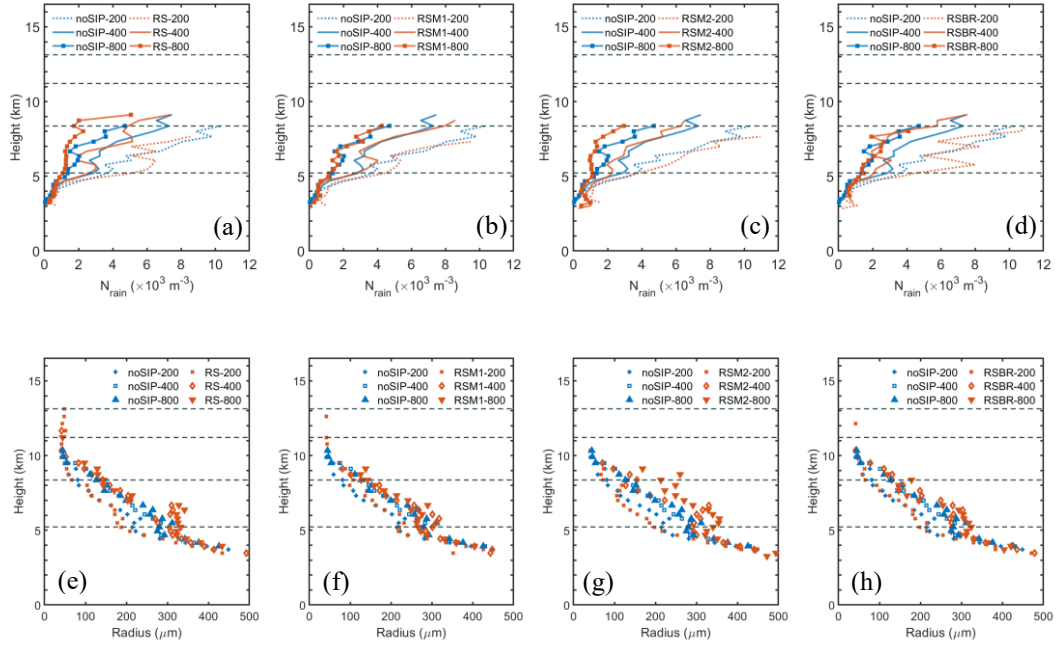

**Figure S4.** Same as Figure S3, but for (a-d) rain number concentration ( $N_{\text{rain}}$ ), and (e-h) rain mean-mass radius.
